# Supplementary material for: Pore-Mouth Structure of Highly Agglomerated Detonation Nanodiamonds
Source: MDPI journal article supplement (doi:10.3390/nano11112772), 2021-10-20
Supplement: s1 [file s1]

# **Pore-Mouth Structure of Highly Agglomerated Detonation Nanodiamonds**

**Elda Zoraida Piña-Salazar <sup>1</sup>, Kento Sagisaka <sup>2</sup>, Takuya Hayashi <sup>1</sup>, Yoshiyuki Hattori <sup>1,2</sup>, Toshio Sakai <sup>3</sup>, Eiji Ōsawa <sup>4</sup> and Katsumi Kaneko <sup>1,\*</sup>**

<sup>1</sup> Research Initiative for Supra-Materials, Interdisciplinary Cluster for Cutting Edge Research, Shinshu

University, Nagano 380-8553, Japan; eldazps@shinshu-u.ac.jp (E.Z.P.-S.);

hayashi@endomoribu.shinshu-u.ac.jp (T.H.); hattoriy@shinshu-u.ac.jp (Y.H.)

<sup>2</sup> Division of Chemistry and Materials, Faculty of Textile Science and Technology, Shinshu University, Ueda 386-8567, Japan; 16st302j@shinshu-u.ac.jp (K.S.); hattoriy@shinshu-u.ac.jp (Y.H.)

<sup>3</sup> Department of Materials Chemistry, Faculty of Engineering, Shinshu University, Nagano 380-8553, Japan; tsakai@shinshu-u.ac.jp

<sup>4</sup> Nano-Carbon Research Institute, Ltd., Ueda 386-8567, Japan; osawa@nano-carbon.jp

\* Correspondence: kkaneko@shinshu-u.ac.jp

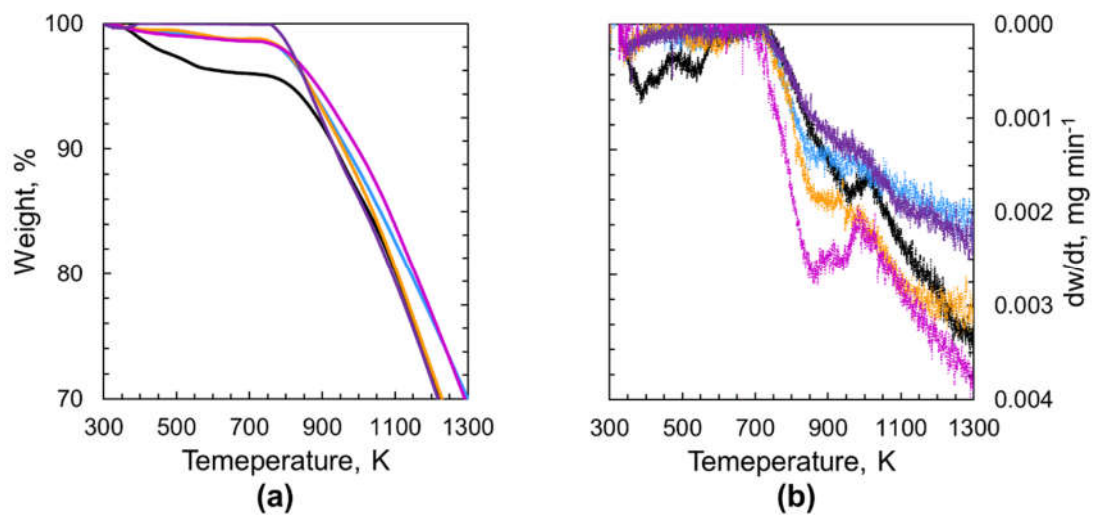

**Figure S1.** Comparison of (a) thermogravimetric (TG) and (b) TG differential profiles of nonheated nanodiamonds (black line -) and nanodiamonds heated at 423 K for 2 h (light blue line -) and 52 h (orange line -); and at 623 K for 2 h (purple line -) and 52 h (pink line -) under an argon atmosphere (Ar 100 mL min<sup>-1</sup>).

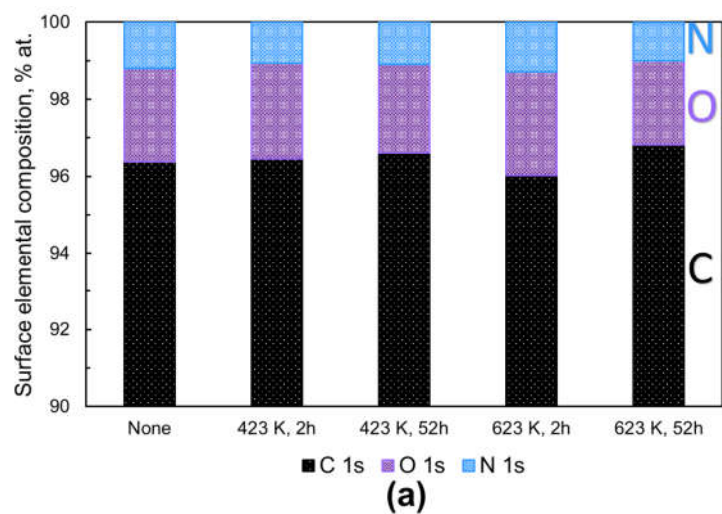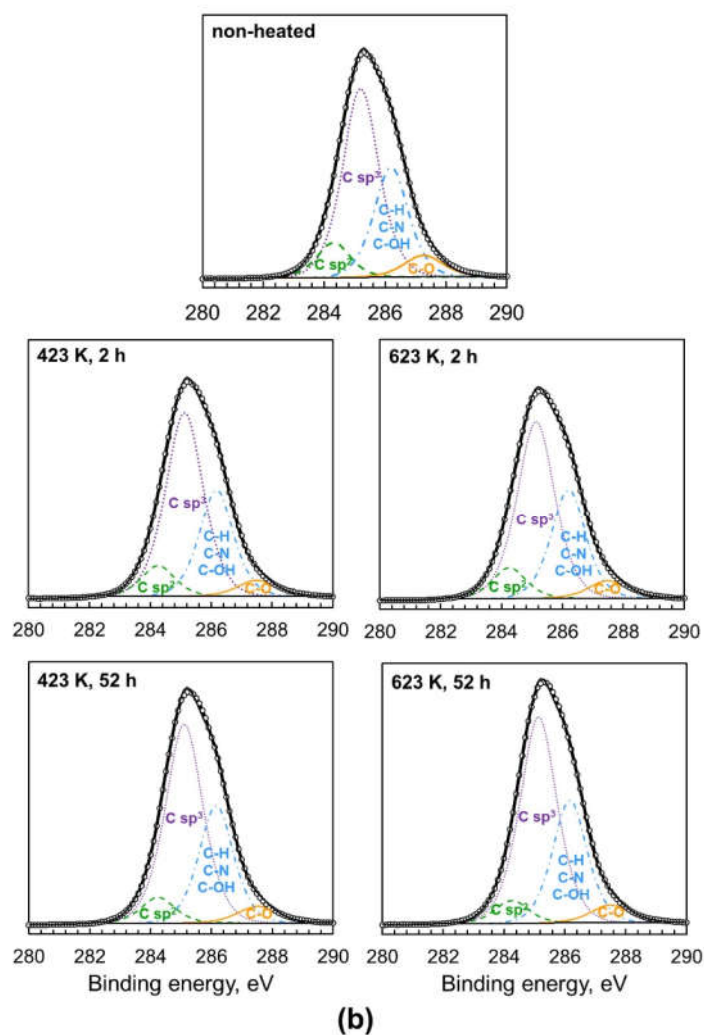

**Figure S2.** XPS analyses nonheated and heated nanodiamonds at 423 K and 623 K for 2 h and 52 h. (a) atomic contents (at. %) of C 1s, O 1s, and N 1s core levels, and (b) deconvolution of the high-resolution C 1s spectra; black bold line, open circles, and colored lines depict the experimental, fitted and deconvoluted spectra, respectively.

**Table S1.** Constituents of C 1s (at. %) from XPS analyses of nonheated and heated nanodiamonds in *vacuo*.

| C 1s<br>components                      | nonheated ND |       | 423 K for 2 h |       | 423 K for 52 h |       | 623 K for 2 h |       | 623 K for 52 h |       |
|-----------------------------------------|--------------|-------|---------------|-------|----------------|-------|---------------|-------|----------------|-------|
|                                         | Position     | %Area | Position      | %Area | Position       | %Area | Position      | %Area | Position       | %Area |
| C sp <sup>2</sup>                       | 284.3        | 9.4   | 284.3         | 8.5   | 284.3          | 6.7   | 284.3         | 8.6   | 284.3          | 5.8   |
| C sp <sup>3</sup>                       | 285.2        | 54.2  | 285.1         | 56.4  | 285.1          | 57.2  | 285.1         | 54.8  | 285.1          | 57.6  |
| C-H, C-N,<br>C-OH                       | 286.2        | 29.8  | 286.2         | 30.1  | 286.2          | 31.1  | 286.2         | 31.0  | 286.2          | 31.5  |
| C-O                                     | 287.3        | 6.6   | 287.5         | 5.0   | 287.5          | 5.0   | 287.5         | 5.6   | 287.5          | 5.1   |
| sp <sup>2</sup> /sp <sup>3</sup> ratio: | 0.17         |       | 0.15          |       | 0.12           |       | 0.16          |       | 0.10           |       |

Fitting accuracy: >94%, G-L (60-40), FWHM 1.4 + 1.0 eV

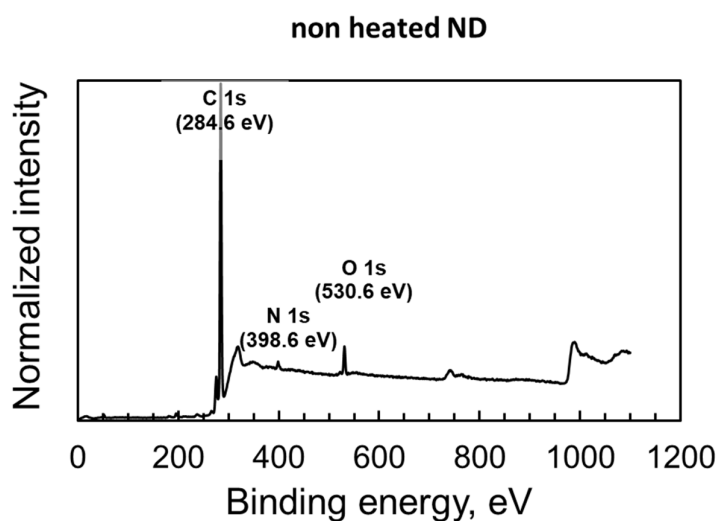

**Figure S3.** XPS wide scan of nonheated nanodiamonds. The main constituents C 1s, O 1s and N1 s are plotted in bold. The plots corresponding to nanodiamonds heated at 423 K and 623 K for 2 and 52 h are not shown.

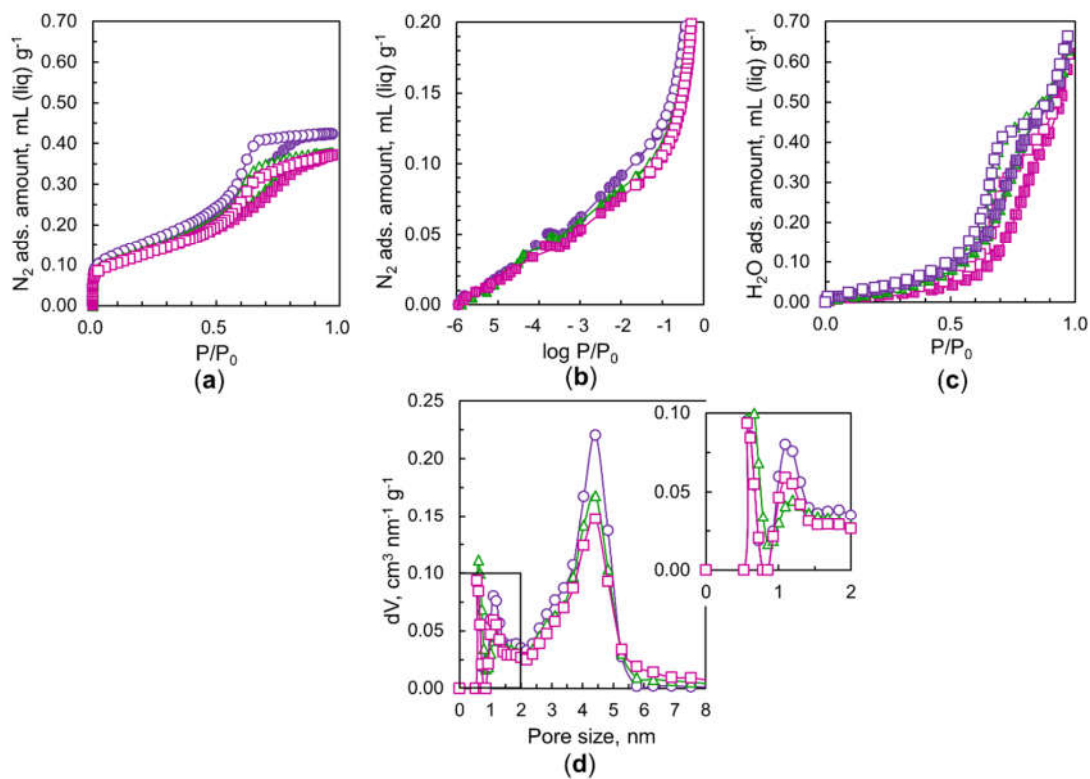

**Figure S4.** Nitrogen adsorption isotherms at 77 K of nanodiamonds heated in *vacuo* at 623 K for different times on (a) linear scale and (b) logarithmic scale, and (c) adsorption isotherms of water at 298 K. (d) QS-DFT-derived pore size distributions of nanodiamonds from nitrogen adsorption. The heating times were 2 h (○), 10 h (△) and 52 h (□). Solid and open symbols in (a), (b) and (c) indicate adsorption and desorption branches, respectively.
